# Supplementary material for: Importance of polypyrrole in constructing 3D hierarchical carbon nanotube@MnO2perfect core–shell nanostructures for high-performance flexible supercapacitors
Source: Royal Society of Chemistry journal article supplement (doi:10.1039/c5nr03426d), 2015-01-01
Supplement: c5nr03426d1.pdf [file c5nr03426d1.pdf]

## Electronic Supplementary Information

### Importance of polypyrrole in constructing 3D hierarchical carbon nanotube@MnO<sub>2</sub> perfect core-shell nanostructures for high- performance flexible supercapacitors

Jinyuan Zhou,<sup>‡\*</sup> Hao Zhao,<sup>‡</sup> Xuemei Mu, Jiayi Chen, Peng Zhang, Zhenxing

Zhang, Xiaojun Pan and Erqing Xie\*

School of Physical Science and Technology, Lanzhou University, Lanzhou, Gansu,

730000, People's Republic of China.

\* To whom correspondence should be addressed.

Tel./Fax: +86 931 89125895, E-mail: [zhoujy@lzu.edu.cn](mailto:zhoujy@lzu.edu.cn) (J. Zhou), [xieeq@lzu.edu.cn](mailto:xieeq@lzu.edu.cn)

(E. Xie)

<sup>‡</sup> These authors contributed equally to this work.

#### 1) The optimizing method to balance the charges on positive and negative electrodes in the asymmetric supercapacitor

The charges stored by each electrode depend on the specific capacitance ( $C_s$ ), the potential window for the charge/discharge process ( $\Delta U$ ) and the mass of the active materials in electrodes ( $m$ ) following the Equation (1):

$$Q = C_s \times \Delta U \times m, \quad (1)$$

So, the balance between the charges on positive and negative electrodes can be represented by

$$C_s^+ \times \Delta U^+ \times m^+ = C_s^- \times \Delta U^- \times m^-, \quad (2)$$

That is

$$\frac{m^-}{m^+} = \frac{C_s^+ \times \Delta U^+}{C_s^- \times \Delta U^-}, \quad (3)$$

In our study, the  $C_s$  were obtained from the CVs (shown in Figure S4) of single electrode at 10 mV s<sup>-1</sup>, and they are 239.3 F g<sup>-1</sup> and 217.6 F g<sup>-1</sup> for the positive and negative electrodes, respectively. The potential ranges of positive and negative electrodes were from 0 to 1 V and from -1 to 0 V, respectively, so the  $\Delta U$  is 2 V. Finally, 1.75 mg AC was matched in SSM/AC, according to the Equation (3) with the known mass of MnO<sub>2</sub> and PPy (0.7 mg) in positive electrode.

## 2) Supplementary figures

### PPy treatments

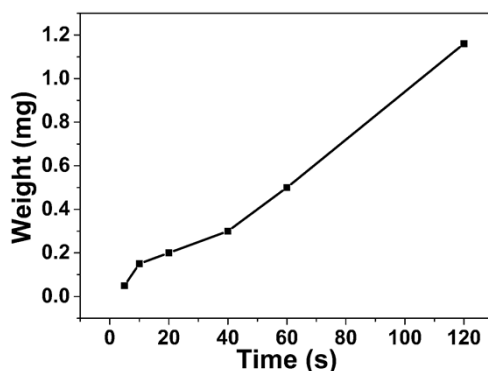

Fig. S1 time-dependent  $\text{MnO}_2$  deposition mass.

After 5-s PPy treatment, the CNTs are unevenly coated with large numbers of PPy nanoparticles. When increasing the treatment time to 10s, the CNTs are uniformly coated with a shell of PPy. Thus, 10-s treatment is enough for our work. Further increasing the treatment time to 20s, there will form many PPy nanoclusters within the CNTs samples. Once, increasing the treatment time to 120s, the outer diameter of the CNT@PPy reaches about 500 nm, implying the formation of an over 200-nm PPy shell on CNTs.

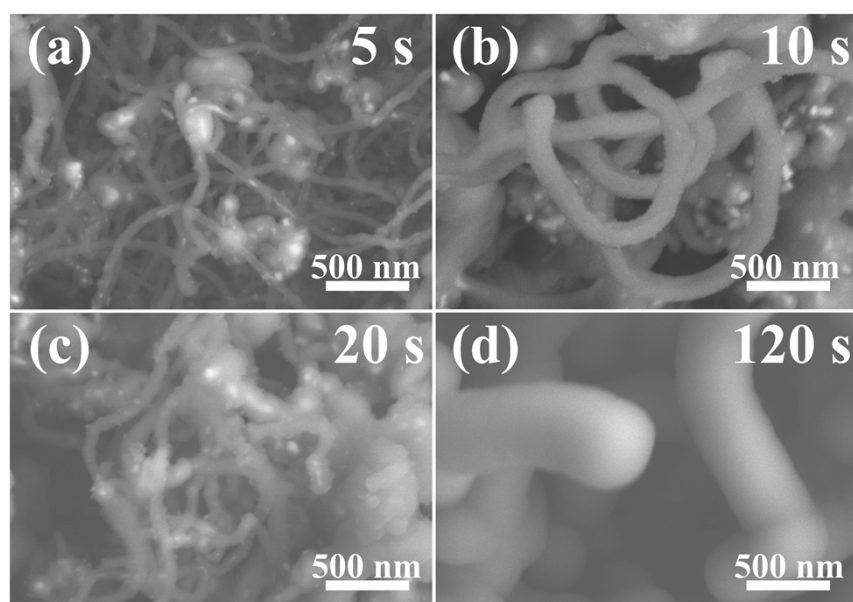

Fig. S2 SEM images of the PPy-treated samples with different time.

The PPy-treated or untreated samples were sent to a Teflon-lined stainless steel autoclave containing 0.03 M  $\text{KMnO}_4$  solution. And then, the  $\text{MnO}_2$  depositions were conducted 60 °C for 0.5, 1, 3, 5, and 7 h. After deposition, the resulting samples were rinsed with DI water for several minutes and naturally dried at room temperature. Via this series of optimization experiments, it is found that the optimized time is 3 h for our case.

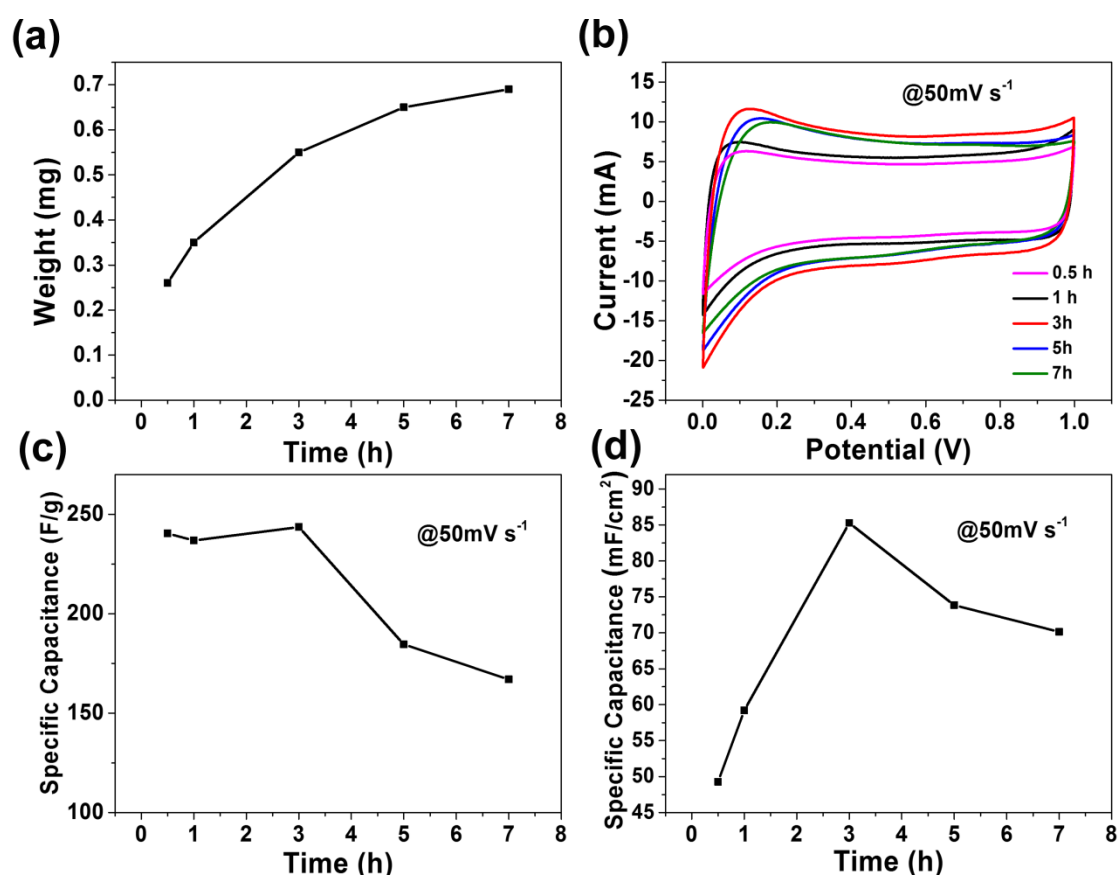

Figure S3 (a) time-dependent  $\text{MnO}_2$  deposition mass, (b) CV curves of the electrodes with different  $\text{MnO}_2$  deposition time, (c) specific capacitance and (d) capacitance per unit area as a function of  $\text{MnO}_2$  deposition time.

The charge balance in the asymmetric supercapacitor was ensured by matching the mass of  $\text{MnO}_2$  and PPy in positive ( $\text{CNTs@PPy@MnO}_2$ ) and AC in negative (SSM/AC) electrodes. The CV of  $\text{CNTs@PPy@MnO}_2$  was measured within a potential range from 0 to 1 V, while that of SSM/AC was measured within a potential range from -1 to 0 V at the same scan rate of 20 mV/s, as shown in Figure 5 (d). Both CVs are relatively rectangular in shape and exhibit near mirror-image current response on voltage reversal, indicating an ideal capacitive behavior and approximately equal charge for both electrodes.<sup>1</sup> The specific capacitances calculated from the CVs are 347.5 F/g for  $\text{CNTs@PPy@MnO}_2$  electrode, and 139 F g<sup>-1</sup> for SSM/AC electrode. So, SSM/AC with 1.75 mg AC have been matched according to the constant mass of PPy (0.15 mg) and  $\text{MnO}_2$  (0.55 mg) in  $\text{CNTs@PPy@MnO}_2$ .

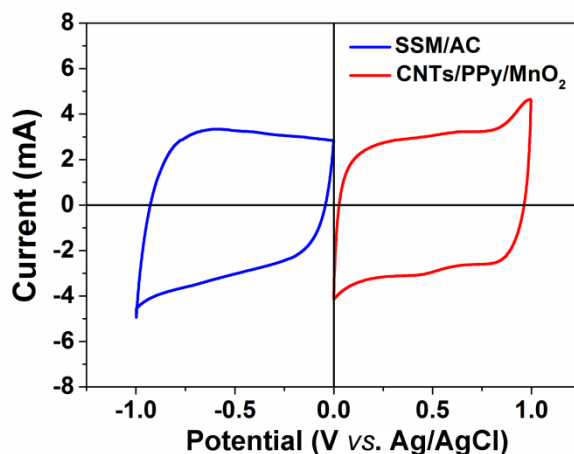

Figure. S4. Comparative CVs of  $\text{CNT@PPy@MnO}_2$  and SSM/AC electrodes at a scan rate of 20 mV s<sup>-1</sup>.

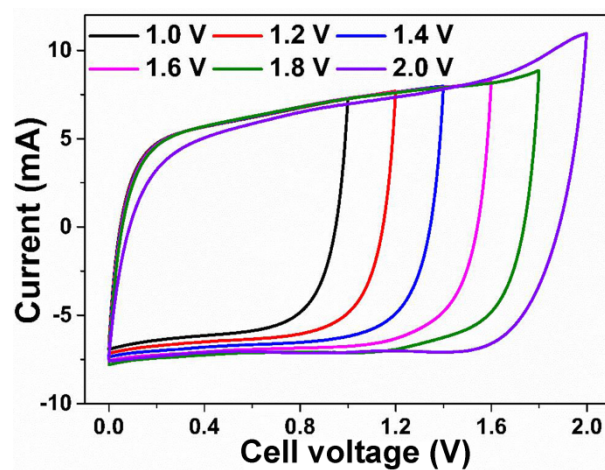

Fig. S5 CV curves of the optimized asymmetric supercapacitor measured at different potential windows in 1 M  $\text{Na}_2\text{SO}_4$  aqueous solution at a scan rate of  $50 \text{ mV s}^{-1}$ .

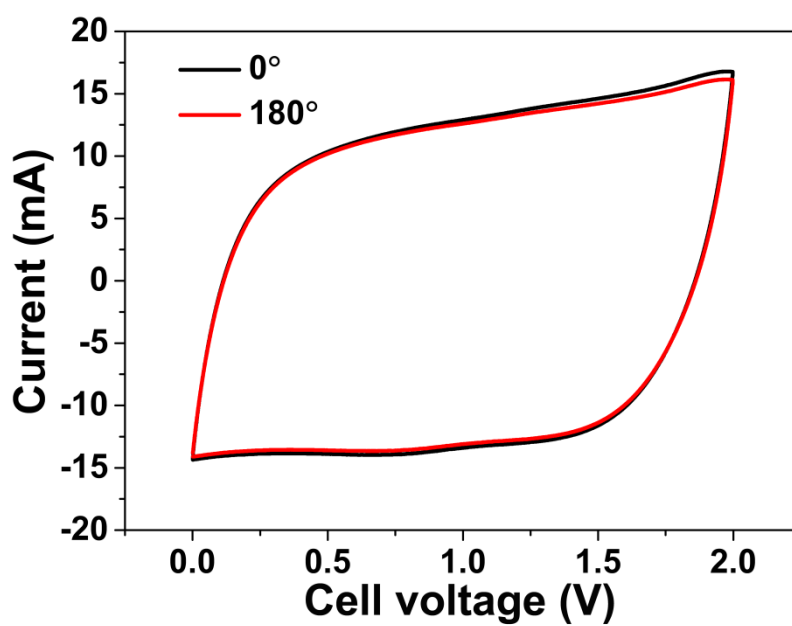

Fig. S6 CVs of the assembled asymmetric supercapacitor under flat and bending conditions (scan rate:  $100 \text{ mV s}^{-1}$ ).

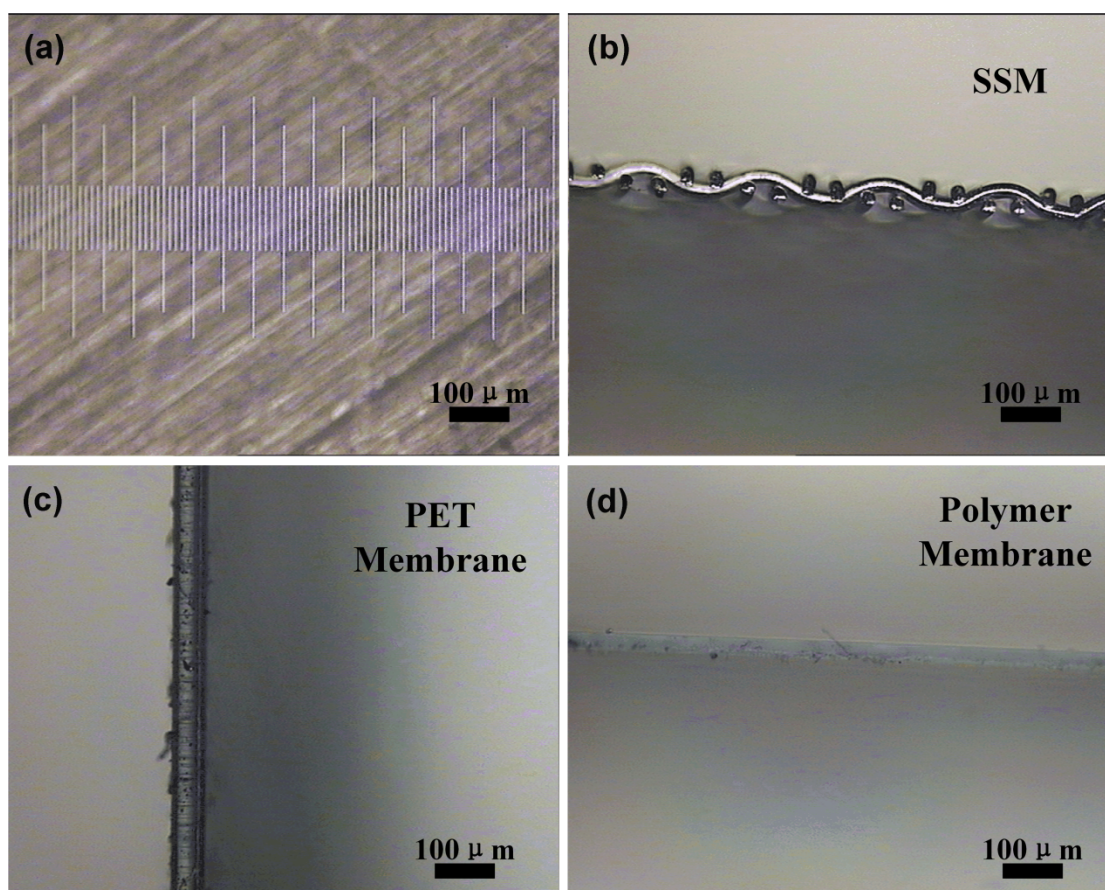

Fig. S7 Optical images of (a) micro ruler, (b) SSM, (c) PET membrane, and (d) polymer membrane.

Their thicknesses are evaluated to be  $\sim 50$ ,  $40$ , and  $30\text{ }\mu\text{m}$ , respectively. Thus, the total thickness of the device can be roughly estimated to be  $(50 \times 2 + 40 \times 2 + 30) = 210\text{ }\mu\text{m}$ .

1. Z. Fan, J. Yan, T. Wei, L. Zhi, G. Ning, T. Li, F. Wei, *Adv. Funct. Mater.* **2011**, 21 (12), 2366-2375.
